# Supplementary material
Source: ML conference proceedings conference paper supplement (https://proceedings.neurips.cc/paper_files/paper/2009/hash/37693cfc748049e45d87b8c7d8b9aacd-Abstract.html)
Supplement: Supplementary file [file 37693cfc748049e45d87b8c7d8b9aacd-Supplemental.zip]

---

# Sparse and Locally Constant Gaussian Graphical Models: Supplementary Material

---

**Jean Honorio, Luis Ortiz, Dimitris Samaras**

Department of Computer Science  
Stony Brook University  
Stony Brook, NY 11794

{jhonorio, leortiz, samaras}@cs.sunysb.edu

**Nikos Paragios**

Laboratoire MAS  
Ecole Centrale Paris  
Chatenay-Malabry, France  
nikos.paragios@ecp.fr

**Rita Goldstein**

Medical Department  
Brookhaven National Laboratory  
Upton, NY 11973  
rgoldstein@bnl.gov

## 1 Parameter Settings for Experiment of Convergence to the Ground Truth

In the results of Figure 2 (Kullback-Leibler divergence with respect to the best method, average precision, recall and Frobenius norm between the recovered model and the ground truth), we measured the ability of our method to recover the ground truth structure from data. Meinshausen-Buhlmann approximation, covariance selection, graphical lasso and our algorithm were executed for sparseness parameter  $\rho = 0.2$ , local constancy parameter  $\tau = 0.3$  and  $K = 10$  iterations for small datasets of four samples. Sparseness parameter  $\rho = 0.03$ , local constancy parameter  $\tau = 0.02$  and  $K = 10$  iterations was used for large datasets of 400 samples. Those parameters were selected because they produced the smallest Kullback-Leibler divergence to the ground truth when using our method. The best parameter values for the Meinshausen-Buhlmann approximation, covariance selection and graphical lasso did not significantly differ from the ones selected by using this method.

## 2 Preprocessing and Parameter Settings for Experiments on Real-World Datasets

An experiment on cardiac MRI was performed in order to recover global deformation such as rotation and shrinking. A short-axis cardiac MRI sequence collected by [1] was used. The segmentation of the myocardium at the end diastole performed by an expert was used for cropping. Preprocessing of the dataset was performed in DROP<sup>1</sup> for computing the displacements of the pixels from the initial reference frame. The cardiac MRI sequence contains 24 images of  $100 \times 100$  pixels. After preprocessing, the number of pixels that correspond to the heart was reduced to 122. We applied our algorithm with sparseness parameter  $\rho = 0.35$ , local constancy parameter  $\tau = 0.05$  and  $K = 10$  iterations.

An experiment on a walking sequence was performed in order to find long range interactions between different parts. The silhouette consisting of 40 landmarks was manually labeled in a video sequence of 79 frames from the Human Identification at a Distance dataset<sup>2</sup>. We applied our algorithm with sparseness parameter  $\rho = 2.5$ , local constancy parameter  $\tau = 0.25$  and  $K = 10$  iterations.

---

<sup>1</sup><http://campar.in.tum.de/Main/Drop>

<sup>2</sup><http://www.cc.gatech.edu/cpl/projects/hid/>

An experiment on functional brain MRI was performed in order to discover differences in processing monetary rewards between cocaine addicted subjects versus healthy control subjects. The time series consists of 87 frames taken every 3.5 seconds. The dataset collected by [2] contains 28 subjects: 16 drug-addicted and 12 healthy non-drug-using control individuals. Preprocessing of the dataset was performed in SPM2<sup>3</sup>, and it included deforming all time series to the same spatial reference template (Talairach space), spatial smoothing, cropping and regular sampling. Each subject has a sequence of 87 images of  $53 \times 63 \times 46$  voxels. After preprocessing, the number of voxels was reduced to 869. We applied our algorithm with sparseness parameter  $\rho = 0.15$ , local constancy parameter  $\tau = 0.01$  and  $K = 10$  iterations.

### 3 Statistical Significance of Generalization Experiments

In the results of Table 3 (Cross-validated log-likelihood on the testing set), we measured the generalization performance of our method. We applied the likelihood ratio test, showing that most of our results are statistically significant. The likelihood ratio test was performed as follows: given the log-likelihood  $L_1$  of a model with  $\kappa_1$  parameters (number of non-zero entries in the precision matrix), and the log-likelihood  $L_0$  of a simpler model with  $\kappa_0 < \kappa_1$  parameters, at significance level  $1 - \alpha = 0.95$  we reject the simpler model if:

$$2(L_1 - L_0) \geq \chi^2_{(\alpha=0.05, DOF=\kappa_1-\kappa_0)}$$

### References

- [1] J. Deux, A. Rahmouni, and J. Garot. Cardiac magnetic resonance and 64-slice cardiac CT of lipomatous metaplasia of chronic myocardial infarction. *European Heart Journal*, 2008.
- [2] R. Goldstein, D. Tomasi, N. Alia-Klein, L. Zhang, F. Telang, and N. Volkow. The effect of practice on a sustained attention task in cocaine abusers. *NeuroImage*, 2007.

---

<sup>3</sup><http://www.fil.ion.ucl.ac.uk/spm/>
